# Supplementary material
Source: MDPI journal article supplement (https://www.mdpi.com/2073-8994/2/3/1625)
Supplement: s1 [file s1]

## Correction

**Fujiki, M. Mirror Symmetry Breaking in Helical Polysilanes: Preference between Left and Right of Chemical and Physical Origin. *Symmetry* 2010, 2, 1625-1652**

Michiya Fujiki

Graduate School of Materials Science, Nara Institute of Science and Technology (NAIST), 8916-5 Takayama, Ikoma, Nara 630-0036, Japan; E-Mail: fujikim@ms.naist.jp

Received: 24 January 2011 / Published: 7 February 2011

I found messy code in Figure 13b (page 1639) in my published paper in *Symmetry* [1]. A correct figure is provided here.

**Figure 13.** (a) Simulated UV and CD spectra of  $(\text{SiH}_2)_{13}$  with a dihedral angle of  $P$ -140°, (b) simulated  $g_{\text{CD}}$  as a function of the dihedral angle in  $\text{H}-(\text{SiH}_2)_{13}\text{-H}$ , (c) photoexcitation energies (singlet and triplet states) of  $\text{H}-(\text{SiH}_2)_{13}\text{-H}$  as a function of the dihedral angle.

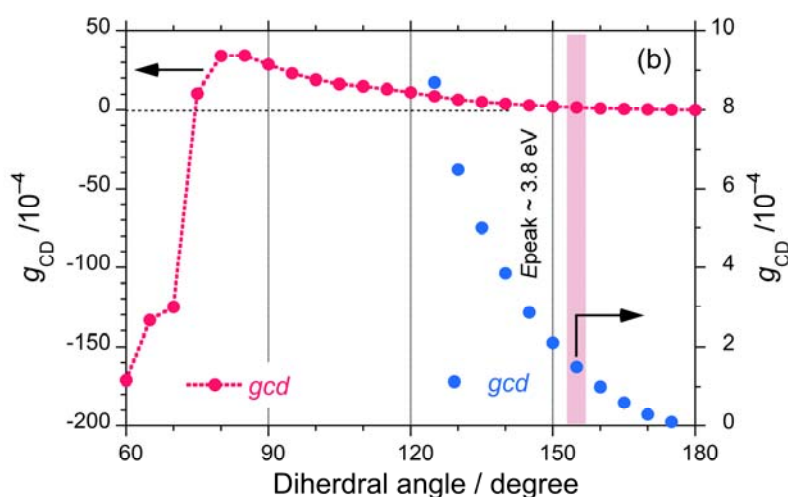

## Reference

1. Fujiki, M. Mirror Symmetry Breaking in Helical Polysilanes: Preference between Left and Right of Chemical and Physical Origin. *Symmetry* 2010, 2, 1625-1652.

© 2011 by the authors; licensee MDPI, Basel, Switzerland. This article is an open access article distributed under the terms and conditions of the Creative Commons Attribution license (<http://creativecommons.org/licenses/by/3.0/>).
